# Supplementary material for: Creation of a facile heterojunction in Co/ZnO–TiO2 for the photocatalytic degradation of alizarin S
Source: Royal Society of Chemistry journal article supplement (doi:10.1039/d4nj00407h), 2024-01-01
Supplement: d4nj00407h1.pdf [file d4nj00407h1.pdf]

**Electronic Supplementary Information**

**Creation of facile heterojunction in Co/ZnO-TiO<sub>2</sub> for photocatalytic  
degradation of Alizarin S**

**Aditi Prabhu,<sup>a</sup> Preetha Chandrasekharan Meenu,<sup>a</sup> Sounak Roy<sup>a,b\*</sup>**

*<sup>a</sup>Department of Chemistry, Birla Institute of Technology and Science Pilani, Hyderabad  
Campus, Hyderabad-500078, India.*

*<sup>b</sup>Materials Center for Sustainable Energy & Environment, Birla Institute of Technology and  
Science Pilani, Hyderabad Campus, Hyderabad – 500078, India*

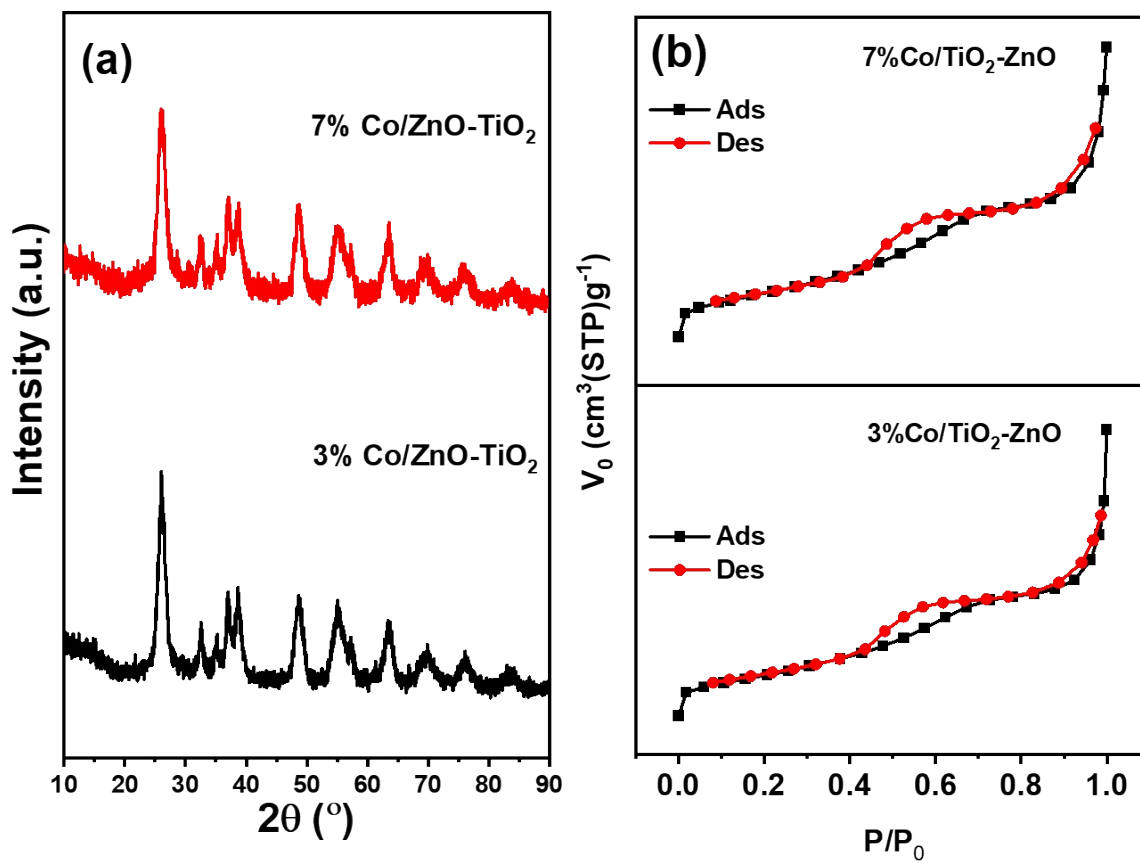

**Fig. S1** (a) XRD pattern and (b) BET isotherm of 3% Co/ZnO-TiO<sub>2</sub> and 7% Co/ZnO-TiO<sub>2</sub>

**Table S1:** Atomic percentage of elements from EDX and XRF for ZnO-TiO<sub>2</sub> and 5% Co/ ZnO-TiO<sub>2</sub>

| Catalyst                   | XRF   |      |     | EDX  |       |     |
|----------------------------|-------|------|-----|------|-------|-----|
|                            | Zn    | Ti   | Co  | Zn   | Ti    | Co  |
| ZnO-TiO <sub>2</sub>       | 26.06 | 73.9 | -   | 30.0 | 89.01 | -   |
| 3% Co/ZnO-TiO <sub>2</sub> | 32.8  | 65.7 | 1.5 | 36.8 | 61.2  | 2.0 |
| 5% Co/ZnO-TiO <sub>2</sub> | 35.93 | 60.7 | 3.8 | 35.9 | 60.6  | 3.5 |
| 7% Co/ZnO-TiO <sub>2</sub> | 37.3  | 57.5 | 5   | 34.9 | 59.2  | 5.9 |

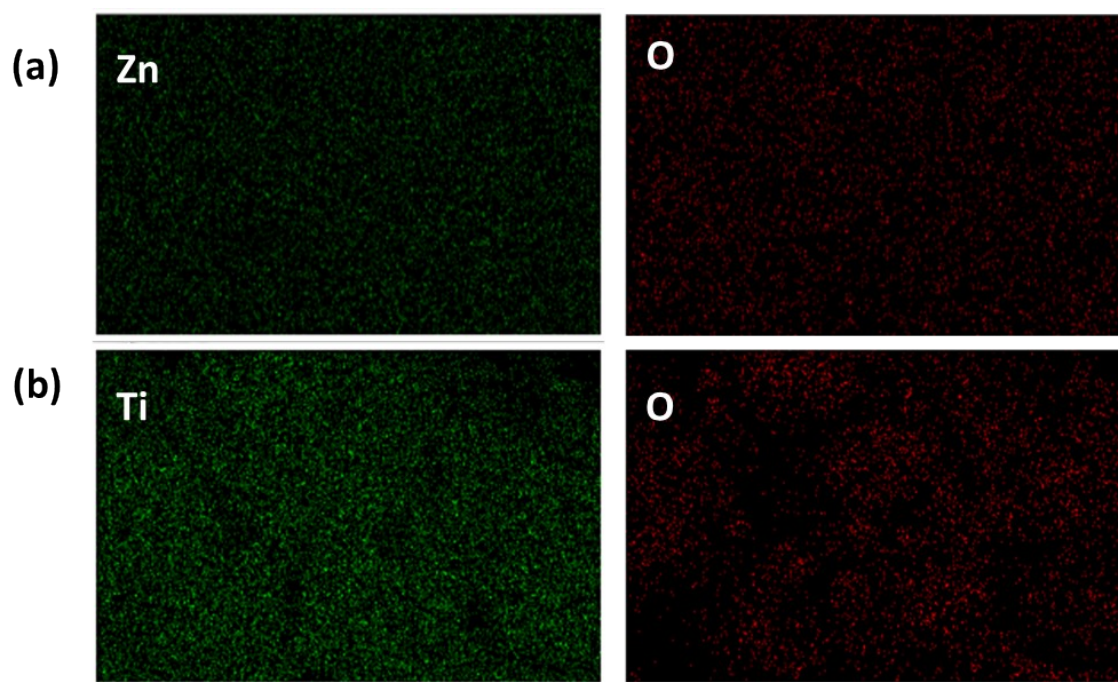

**Fig. S2** EDX mapping of (a) ZnO (b) TiO<sub>2</sub>

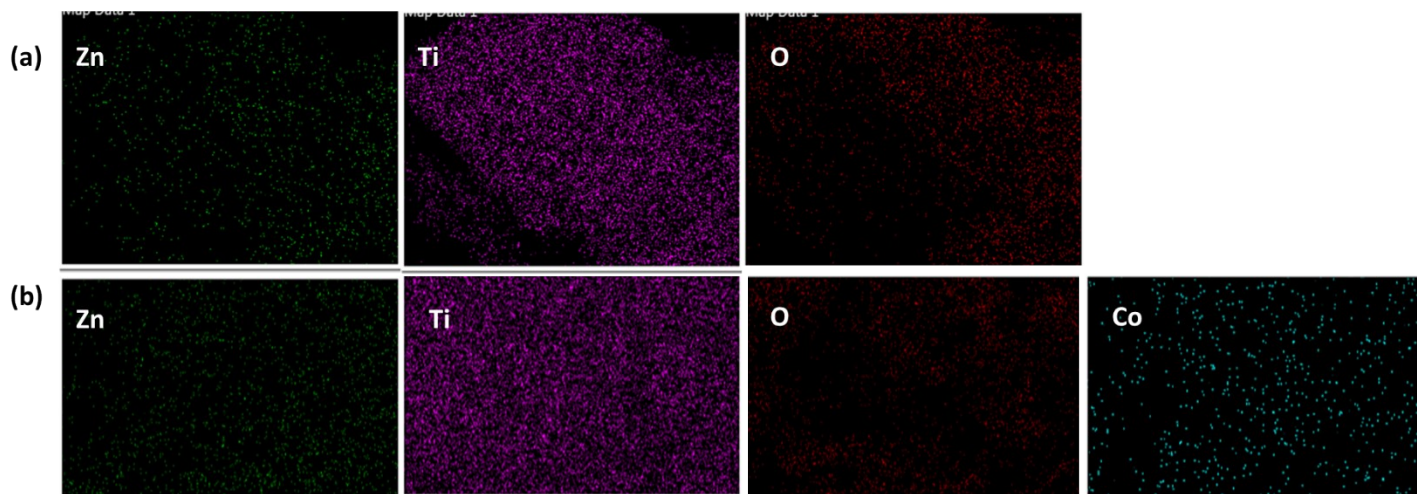

**Fig. S3** EDX mapping of (a) ZnO -TiO<sub>2</sub> (b) 5% Co/ZnO-TiO<sub>2</sub>

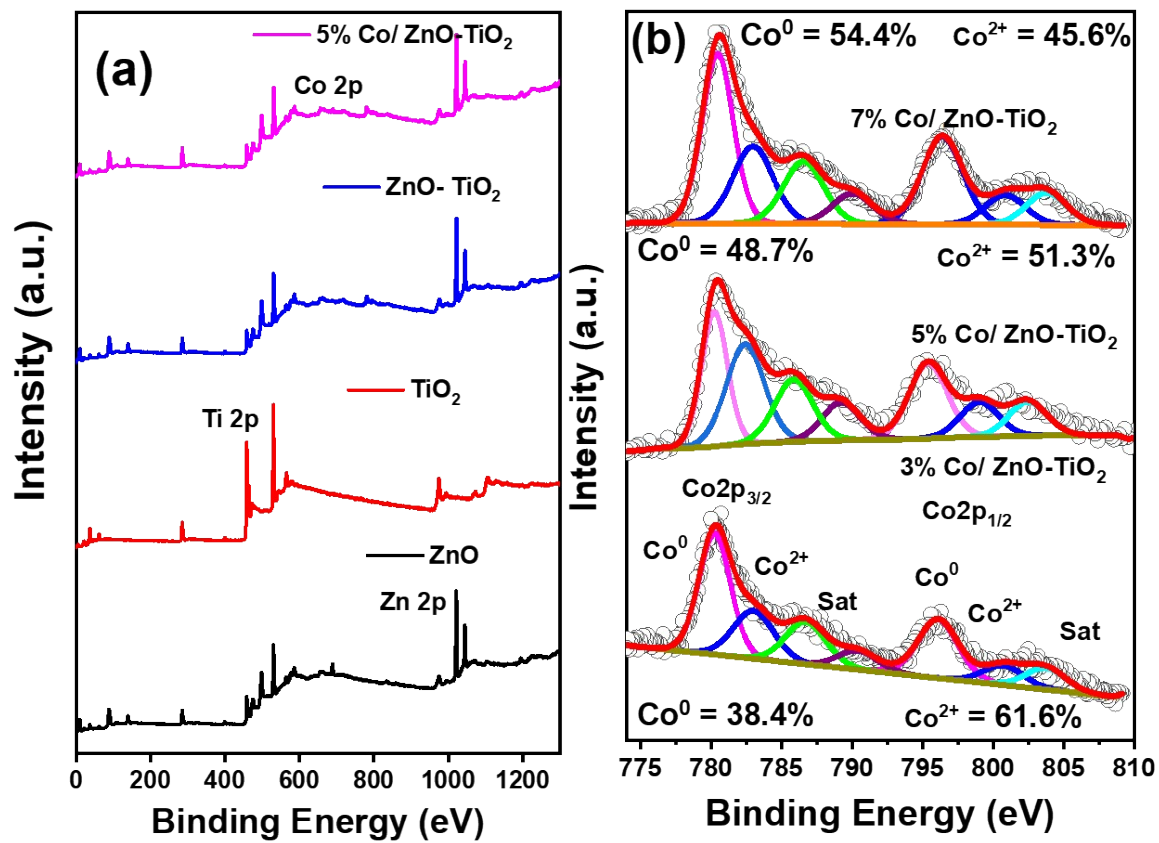

**Fig. S4** (a) XPS survey spectra and (b) Co 2p core level spectra

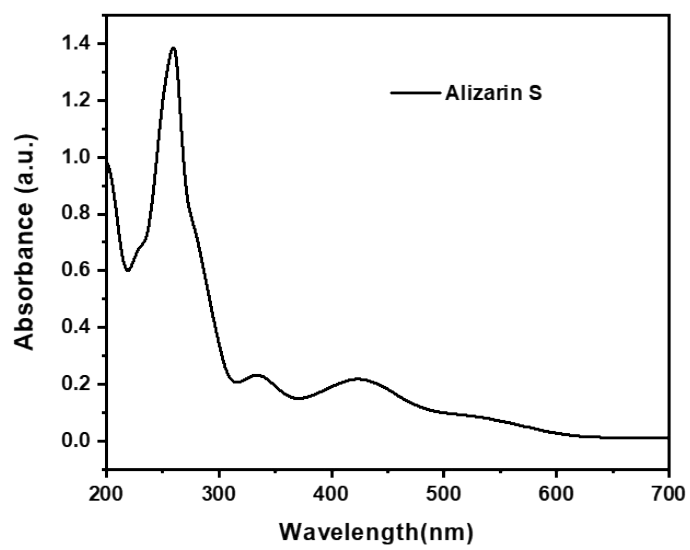

**Fig. S5** UV-visible spectra of Alizarin S

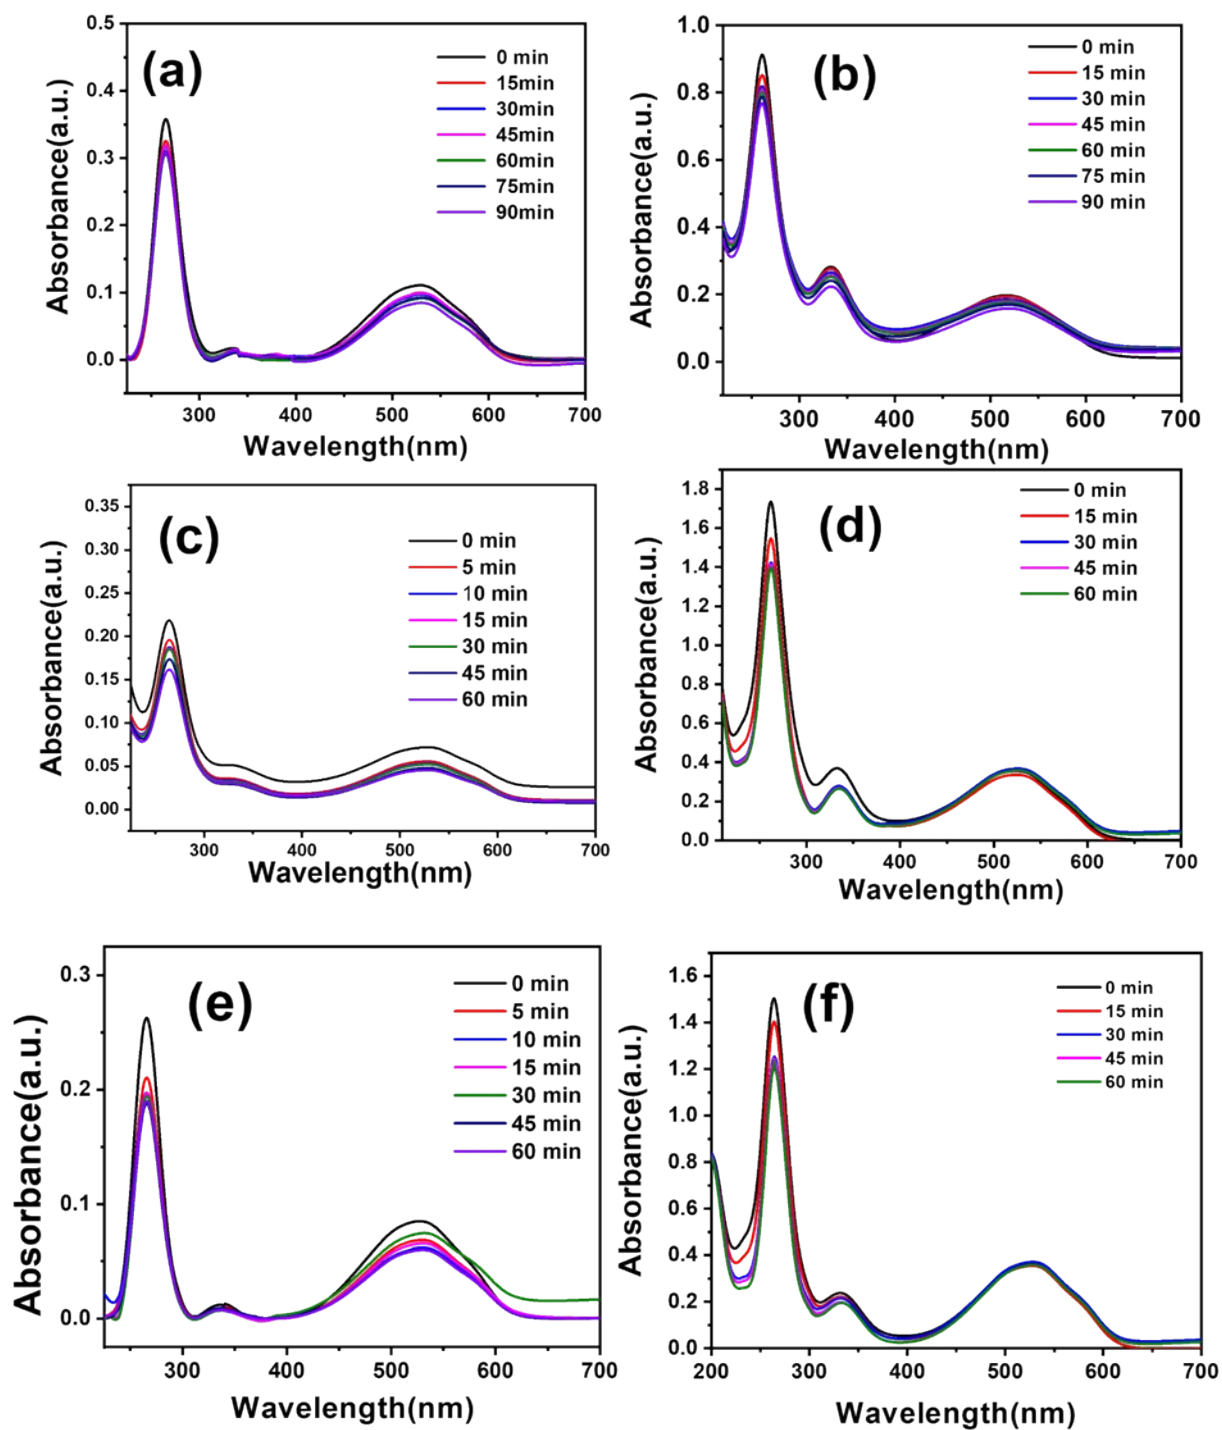

**Fig. S6** UV visible spectrum of (a) ZnO (b) TiO<sub>2</sub> (c) ZnO-TiO<sub>2</sub> (d) 3%Co/ZnO-TiO<sub>2</sub> (e) 5%Co/ZnO-TiO<sub>2</sub> and (f) 7%Co/ZnO-TiO<sub>2</sub> after alizarin S adsorption in dark condition

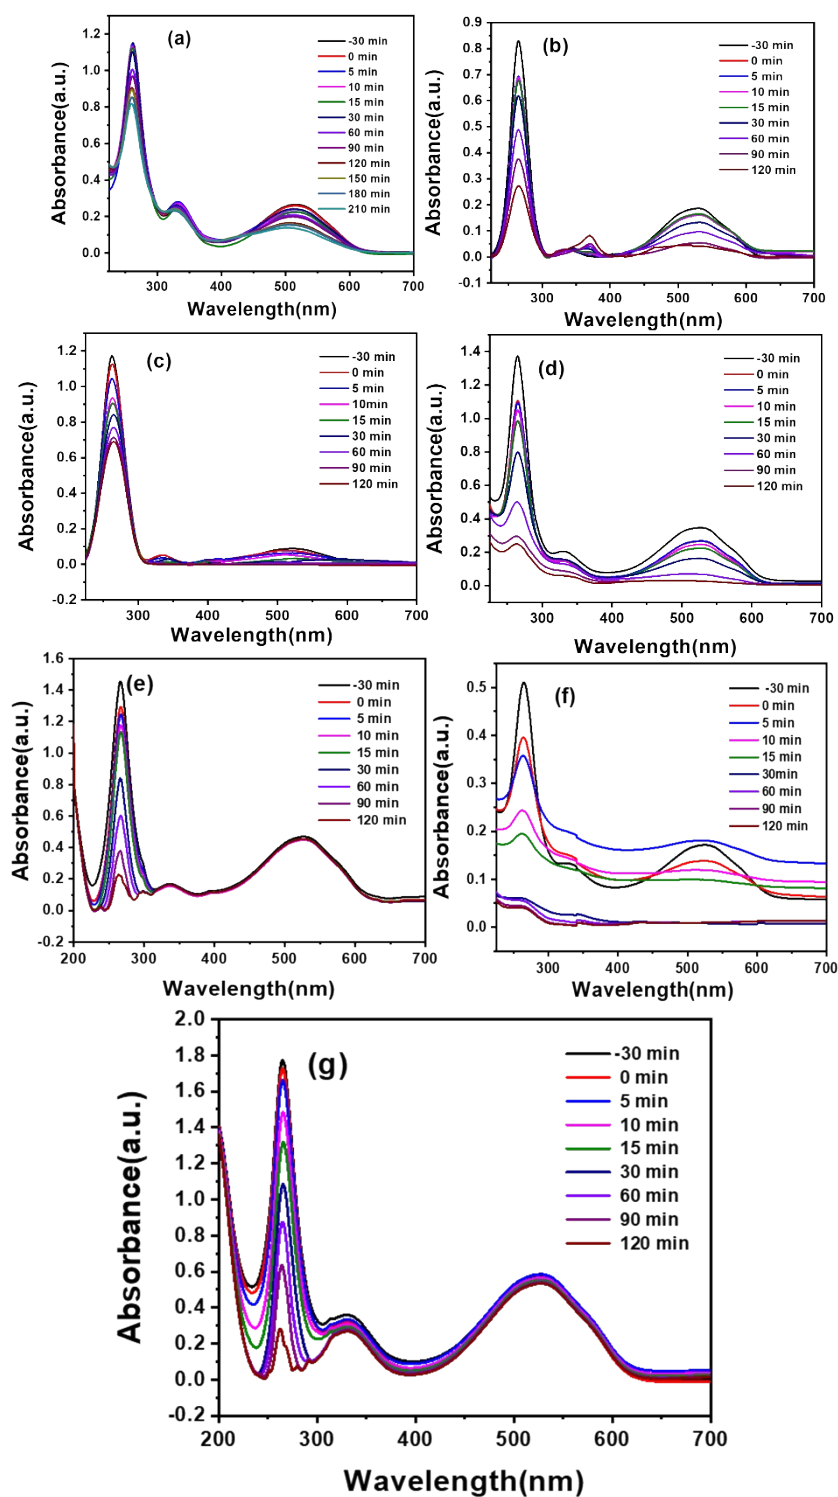

**Fig. S7** UV visible spectrum of alizarin S degradation (a) without catalyst (b) ZnO (c) TiO<sub>2</sub> (d) ZnO-TiO<sub>2</sub> (e) 3%Co/ZnO-TiO<sub>2</sub> (f) 5%Co/ZnO-TiO<sub>2</sub> and (g) 7%Co/ZnO-TiO<sub>2</sub>



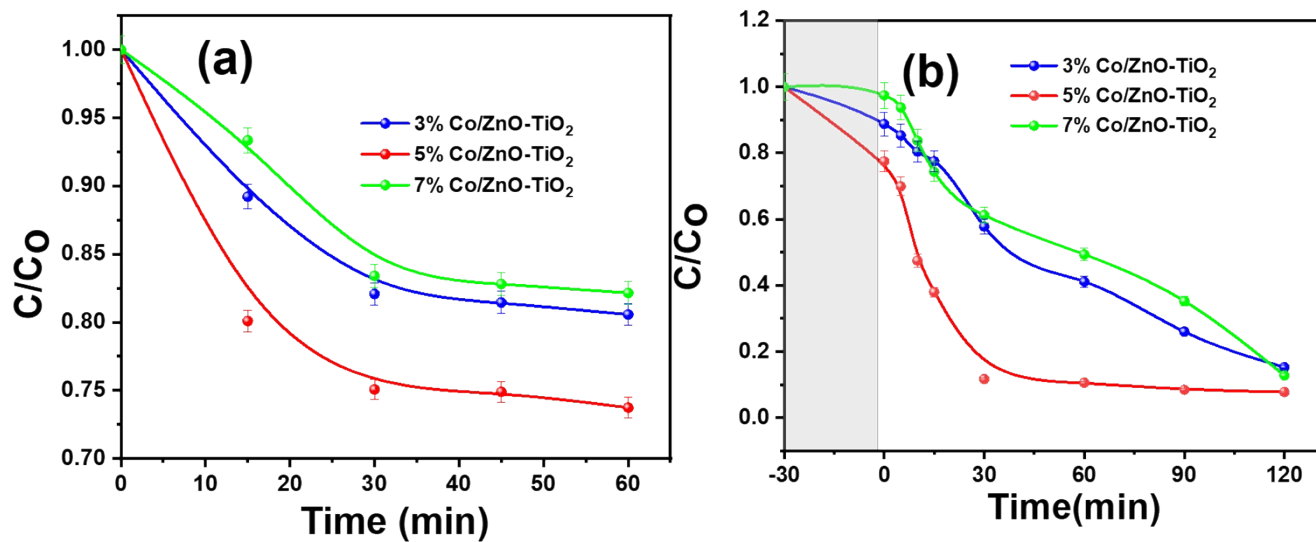

**Fig. S8** (a) Adsorption of Alizarin S in dark, and (b) Alizarin S photodegradation over 3%Co/ZnO-TiO<sub>2</sub>, 5%Co/ZnO-TiO<sub>2</sub>, and 7%Co/ZnO-TiO<sub>2</sub>

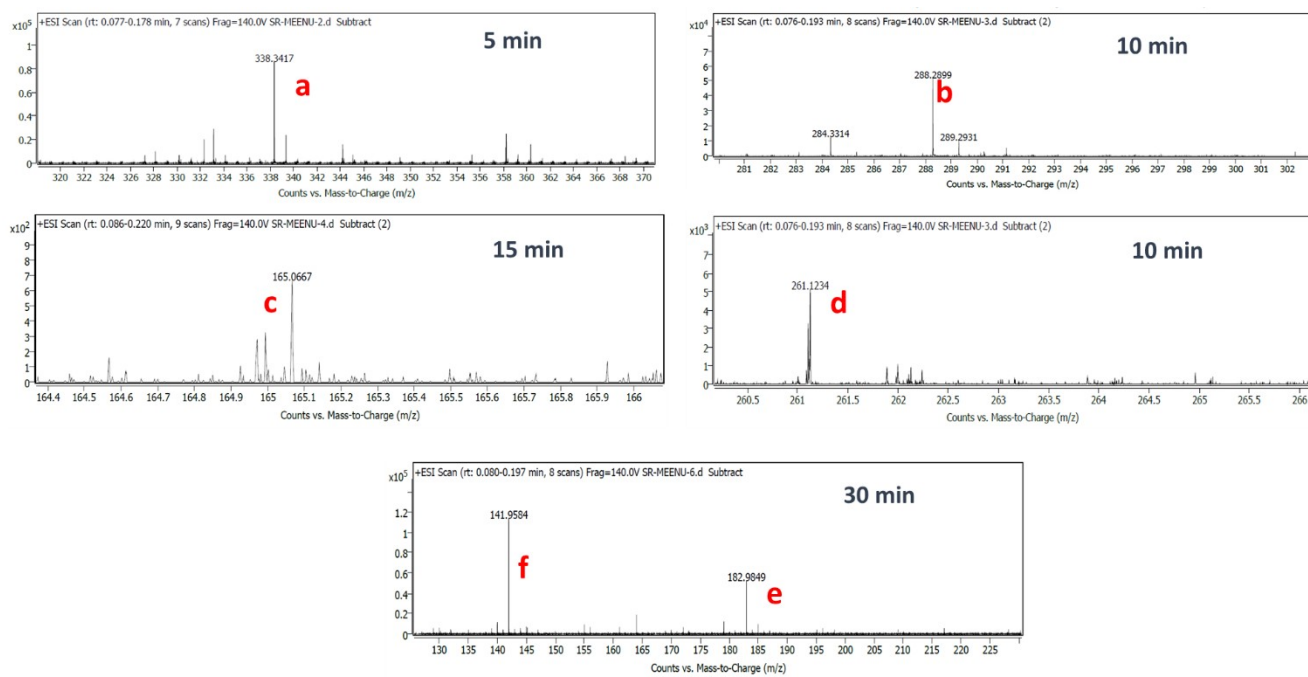

**Fig. S9** HR-MS of Alizarin S degradation using 5%Co/ZnO-TiO<sub>2</sub> catalyst production by at various time interval

**Table S2:** A comparative data on the QY from similar catalysts.

| <b>Dye</b>     | <b>Catalysts</b>                                   | <b>Light source</b>    | <b>Time for degradation (min)</b> | <b>Wavelength of incident light (nm)</b> | <b>Quantum yield (%)</b> | <b>References</b> |
|----------------|----------------------------------------------------|------------------------|-----------------------------------|------------------------------------------|--------------------------|-------------------|
| Acid Red 37    | 0.5(ZnO:TiO <sub>2</sub> )/0.18 AgNP               | 13.4 W                 | 50                                | 254                                      | 20.2                     | [1]               |
| Methylene Blue | Au on ZnO                                          | 1000 W.m <sup>-2</sup> | 60                                | 664                                      | 35                       | [2]               |
| Acid Red 37    | TiO <sub>2</sub> /ZnO/IO <sub>4</sub> <sup>-</sup> | 13.4                   | 350                               | 254                                      | 16.6                     | [3]               |
| Alizarin S     | 5%Co/ZnO-TiO <sub>2</sub>                          | 125 W                  | 120                               | 313                                      | 24.1                     | Our work          |

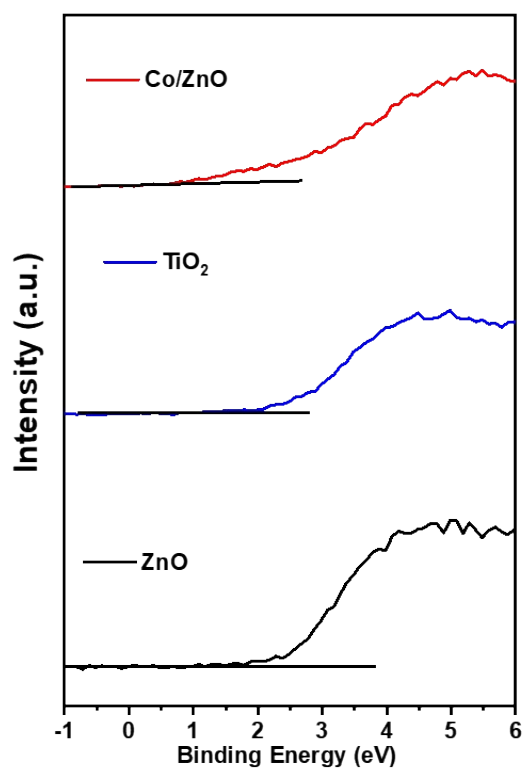

**Fig. S10** VB spectra of ZnO, TiO<sub>2</sub> and 5% Co/ZnO.
